# Supplementary material for: Timelines of translational science: From technology initiation to FDA approval
Source: PLoS One. 2017 May 8;12(5):e0177371. doi: 10.1371/journal.pone.0177371 (PMC5421779; doi:10.1371/journal.pone.0177371)
Supplement: S1 Table — For this analysis, we have explored many different equations that might be used to model technology growth, including functions fit to the cumulative number of publications (exponential, logistic, Richardson, Gompertz, exponentiated logistic, and exponentiated Gompertz). Both the exponetiated Gompertz and exponentiated logistic functions fit the majority of datasets examined. Both are routinely calculated in our analysis. We show the Ti, Te and residual mean square error for both functions. For the technologies in this study, the average residual mean square error was marginally better with the exponentiated Gompertz function (199) than EL (226). Our preference for the exponentiated logistic function over the exponentiated Gompertz function is based on two “ground truth” experiments that are routinely performed when testing the applicability of the model. First, we search the literature for historical review articles, and ask whether the estimated initiation point corresponds to seminal research advances highlighted by experts in the field. We find that the estimate of initiation provided by the exponentiated logistic model most often corresponds to seminal advances highlighted in review articles. Second, based on the timelines described in review articles and the titles/abstracts of articles identified in the PubMed search, we ask whether significant advances were made before the estimated initiation point. Across all technologies studied, we find that the estimates of initiation provided by the exponentiated Gompertz function often post-date an extended period of rapid advance in the field. (XLSX) [file pone.0177371.s001.xlsx]

## Sheet: S1
Active ingredients	Search Terms	NCE (1,0)	Biologic (1,0)	Targeted/biologic or phenotypic (1.0)	first-in class targeted, NCE (1,0)	follow-on , targeted NCE (1,0)	first in class targeted biologic (1,0)	follow-on targeted biologic (1,0)	Ti (exp. Gompertz)	Te (exp. Gompertz)	residual mean squared error (exp.Gompertz)	Ti (exp. logistic)	Te (exp. logisitic)	residual mean square error (exp. logistic)	clinical entry for analysis	year of approval	years in clinical trials	clinical trial start -te	mature before clinical entry (yes=1, no=0)	Ti--> clinical entry	Ti--> approval	Te--> clinical entry	Te--> approval
Dabigatran (Pradaxa)	thrombin[MeSH Terms]	1	0	1	1	0	0	0	1938	1977	54.2	1931.14	1979.11	60.1	2002	2010	8	22.891	1	70.8607	78.8607	22.891	30.891
Abiraterone (Zytiga)	CYP17A1	1	0	1	1	0	0	0	1963	1989	22.1	1957.86	1992.9	25.3	1997	2011	14	4.09753	1	39.1446	53.1446	4.09753	18.0975
Carglumic acid (Carbaglu)	carbamoyl-phosphate synthase	1	0	1	1	0	0	0	1960	1990	74.3	1959.03	1983.08	110.5	2002	2010	8	18.9245	1	42.9742	50.9742	18.9245	26.9245
Mipomersen sodium (Kynamro)	APOB OR apolipoprotein B	1	0	1	1	0	0	0	1972	1986	46.6	1962.48	1988.88	58	2003	2013	10	14.1184	1	40.5219	50.5219	14.1184	24.1184
Riociguat (Adempas)	"soluble guanylate cyclase"	1	0	1	1	0	0	0	1968	2004	46.8	1967.06	1994	67.4	2005	2013	8	11	1	37.9373	45.9373	11	19
Ponatinib (Iclusig)	bcr-abl	1	0	1	1	0	0	0	1973	1992	111.6	1967	1993.43	132.2	2008	2012	4	14.5716	1	40.9969	44.9969	14.5716	18.5716
Canagliflozin (Invokana)	sodium glucose transporter	1	0	1	1	0	0	0	1970	2014	91.7	1970.04	2000.42	115.9	2006	2013	7	5.57528	1	35.9556	42.9556	5.57528	12.5753
Perampanel (Fycompa)	AMPA 1	1	0	1	1	0	0	0	1981	1993	40.4	1976.2	1995.51	53.5	2003	2012	9	7.48926	1	26.8042	35.8042	7.48926	16.4893
Cabozantinib (Cometriq)	c-Met or heptacyte growth factor	1	0	1	1	0	0	0	1960	2004	152	1976.22	2000.87	174.9	2005	2012	7	4.13298	1	28.7769	35.7769	4.13298	11.133
Ivacaftor (Kalydeco)	CFTR	1	0	1	1	0	0	0	1981	1994	75.2	1976.7	1996.08	88.6	2006	2012	6	9.9204	1	29.3005	35.3005	9.9204	15.9204
Ruxolitinib (Jakafi)	janus kinases[MeSH Terms]	1	0	1	1	0	0	0	1981	2012	351.8	1976.63	2006.99	399.8	2007	2011	4	0.011	1	30.367	34.367	0.011	4.011
Boceprevir (Victrelis)	HCV NS3	1	0	1	1	0	0	0	1981	2011	84.5	1976.8	2004.8	110	2003	2011	8	-1.799	0	26.197	34.197	-1.799	6.201
Tofacitinib (Xeljanz)	janus kinases[MeSH Terms]	1	0	1	1	0	0	0	1981	2012	351.8	1978.14	2004.16	399.8	2003	2012	9	-1.15993	0	24.8585	33.8585	-1.15993	7.84007
Icatibant (Firazyr)	bradykinin receptor B2	1	0	1	1	0	0	0	1984	1992	18	1979.71	1994.6	22.3	1992	2011	19	-2.60203	0	12.2938	31.2938	-2.60203	16.398
Vismodegib (Erivedge)	hedgehog signaling OR (hedgehog AND Drosophila)	1	0	1	1	0	0	0	1985	2002	27.5	1981.15	2004.82	34.6	2007	2012	5	2.17967	1	25.8519	30.8519	2.17967	7.17967
Mirabegron (Myrbetriq)	"beta 3" AND adrenergic receptor	1	0	1	1	0	0	0	1985	1994	18.8	1981.47	1997.1	22.3	2004	2012	8	6.90332	1	22.5327	30.5327	6.90332	14.9033
Trametinib (Mekinist)	mitogen-activated protein kinase kinases[MeSH Terms]	1	0	1	1	0	0	0	1986	1999	49.3	1982.55	2000	72.7	2008	2013	5	8	1	25.4543	30.4543	8	13
Ibrutinib (Imbruvica)	bruton's tyrosine kinase	1	0	1	1	0	0	0	1987	1995	22.4	1984.72	1998.72	24.5	2009	2013	4	10.2836	1	24.2787	28.2787	10.2836	14.2836
Sofosbuvir (Sovaldi)	HCV NS5B	1	0	1	1	0	0	0	1987	2009	6.7	1986.05	2008.24	6.4	2007	2013	6	-1.236	0	20.951	26.951	-1.236	4.764
Lomitapide (Juxtapid)	Microsomal triglyceride transfer protein	1	0	1	1	0	0	0	1987	2006	36.3	1986	2002.55	51.8	2005	2012	7	2.45192	1	19.0024	26.0024	2.45192	9.45192
Roflumilast (Daliresp)	phosphodiesterase 4	1	0	1	1	0	0	0	1988	2007	79.2	1985.66	2002.21	107.5	1995	2011	16	-7.21233	0	9.34092	25.3409	-7.21233	8.78767
Apremilast (Otezla)	phosphodiesterase 4	1	0	1	1	0	0	0	1988	2007	79.2	1986	2002	107.5	2003	2014	11	1	1	17	28	1	12
Vorapaxar (Zontivity)	"protease activated receptor"	1	0	1	1	0	0	0	1991	2008	88.1	1989	2007	110.3	2004	2014	10	-3	0	15	25	-3	7
Idelalisib (Zydelig)	Phosphoinositide 3-kinase	1	0	1	1	0	0	0	1985	2009	226.8	1981	2006	264.5	2008	2014	6	2	1	27	33	2	8
Suvorexant (Belsomra)	orexin receptors 1 and 2	1	0	1	1	0	0	0	1993	2008	65	1990	2008	82.1	2007	2014	7	-1	0	17	24	-1	6
Nintedanib (Ofev)	protein kinases[MeSH Terms]	1	0	1	1	0	0	0	1955	2024	7839.3	1947	2002	7249.7	2004	2014	10	2	1	57	67	2	12
Olaparib (Lynparza)	PARP	1	0	1	1	0	0	0	1985	2012	309.8	1982	2007	356.4	2005	2014	9	-2	0	23	32	-2	7
Ocriplasmin (Jetrea)‡	plasmin	0	1	1	0	0	1	0	1930	1969	37.2	1919.96	1974.58	35.5	2002	2012	10	27.4227	1	82.042	92.042	27.4227	37.4227
Alglucosidase alfa (Lumizyme)	alpha glucosidase	0	1	1	0	0	1	0	1951	1999	337.2	1943.98	1986.59	447.2	1998	2010	12	11.4056	1	54.0217	66.0217	11.4056	23.4056
Glucarpidase (Voraxaze)‡	carboxypeptidase G	0	1	1	0	0	1	0	1958	1981	4.2	1952.48	1991.8	4.4	2004	2012	8	12.2001	1	51.5223	59.5223	12.2001	20.2001
Pasireotide diaspartate (Signifor)	somatostatin	0	1	1	0	0	1	0	1963	1981	122.1	1955.53	1982.29	150.4	2001	2012	11	18.7098	1	45.4741	56.4741	18.7098	29.7098
Collagenase clostridium histolyticum (Xiaflex)	"microbial collagenase"[MeSH Terms]	0	1	1	0	0	1	0	1952	1982	339	1955.57	1973.46	481.6	2003	2010	7	29.542	1	47.432	54.432	29.542	36.542
Ado-trastuzumab emtansine (Kadcyla)	HER2 OR eErb2 OR p185	0	1	1	0	0	1	0	1969	2223	15.9	1967.79	2004.86	15.8	2006	2013	7	1.13921	1	38.2118	45.2118	1.13921	8.13921
Tesamorelin (Egrifta)	growth hormone-releasing hormone[MeSH Terms]	0	1	1	0	0	1	0	1973	1983	19.6	1967.39	1985.36	24.3	1999	2010	11	13.6412	1	31.6084	42.6084	13.6412	24.6412
Linaclotide (Linzess)	guanylyl cyclase c	0	1	1	0	0	1	0	1959	2000	247.9	1974.44	1995.53	400	2004	2012	8	8.47079	1	29.5647	37.5647	8.47079	16.4708
Tocilizumab (Actemra)	interleukin 6 receptor	0	1	1	0	0	1	0	1978	2004	495.5	1974.13	1996.2	660.5	1998	2010	12	1.79578	1	23.8687	35.8687	1.79578	13.7958
Brentuximab vedotin (Adcetris)‡	cd30	0	1	1	0	0	1	0	1980	1993	31.8	1975.63	1996.08	38.7	2006	2011	5	9.91544	1	30.3739	35.3739	9.91544	14.9154
Denosumab (Prolia)	tnfsf11	0	1	1	0	0	1	0	1971	2043	425.6	1978.12	2007.91	351.1	1998	2010	12	-9.91465	0	19.8841	31.8841	-9.91465	2.08535
Belatacept (Nulojix)‡	cytotoxic T-lymphocyte-associated protein 4 OR CTLA-4	0	1	1	0	0	1	0	1984	2006	195.2	1981.58	2000.02	263.9	2001	2011	10	0.977034	1	19.4221	29.4221	0.977034	10.977
Ipilimumab (Yervoy)‡	cytotoxic T-lymphocyte-associated protein 4 OR CTLA-4	0	1	1	0	0	1	0	1984	2006	195.2	1981.58	2000.02	263.9	2001	2011	10	0.977034	1	19.4221	29.4221	0.977034	10.977
Lucinactant (Surfaxin)	surfactant protein B	0	1	1	0	0	1	0	1986	1996	7.8	1983.56	2000.76	7.4	1994	2012	18	-6.75514	0	10.4359	28.4359	-6.75514	11.2449
Teduglutide (Gattex)	(glucagon-like peptide 2 or glp2 or glp-2)	0	1	1	0	0	1	0	1981	2015	22.1	1983.96	2004.55	24	1998	2012	14	-6.54844	0	14.0385	28.0385	-6.54844	7.45156
Ziv-aflibercept (Zaltrap)‡	receptors, vascular endothelial growth factor[MeSH Terms]	0	1	1	0	0	1	0	1988	2003	37.7	1984.51	2003.63	54.3	2001	2012	11	-2.628	0	16.488	27.488	-2.628	8.372
Belimumab (Benlysta)‡	TNFSF13B	0	1	1	0	0	1	0	1995	2002	14.7	1992.77	2005.64	16.8	2001	2011	10	-4.63688	0	8.22875	18.2288	-4.63688	5.36312
Raxibacumab‡	anthrax toxin receptor	0	1	1	0	0	1	0	1995	2008	7.4	1995.56	2006.1	11.1	2003	2012	9	-3.1029	0	7.44449	16.4445	-3.1029	5.8971
Metreleptin (Myalept)	Leptin	0	1	1	0	0	1	0	1987	2006	847.3	1983	2004	1060.9	1999	2014	15	-5	0	16	31	-5	10
Siltuximab (Sylvant)	interleukin 6 receptor	0	1	1	0	0	1	0	1978	2004	495.5	1974	1996	660.5	1998	2014	16	2	1	24	40	2	18
Blinatumomab (Blincyto)	CD3	0	1	1	0	0	1	0	1974	1999	1465.7	1967	1996	1992.3	2002	2014	12	6	1	35	47	6	18
Rivaroxaban (Xarelto)	coagulation factor X	1	0	1	0	1	0	0	1938	2001	222.4	1928.3	1989.94	328.1	2002	2011	9	12.059	1	73.6987	82.6987	12.059	21.059
Ospemifene (Osphena)	estrogen receptor	1	0	1	0	1	0	0	1942	2014	192.6	1935.07	1998.85	186.5	2001	2013	12	2.15337	1	65.932	77.932	2.15337	14.1534
Enzalutamide (Xtandi)	androgen receptor	1	0	1	0	1	0	0	1944	2020	58.8	1938.79	2002.56	56.5	2007	2012	5	4.43614	1	68.2081	73.2081	4.43614	9.43614
Apixaban (Eliquis)	factor Xa	1	0	1	0	1	0	0	1966	1985	17.6	1955.49	1991.69	20.3	2004	2012	8	12.306	1	48.5116	56.5116	12.306	20.306
Indacaterol (Arcapta neohaler)	beta-2-adrenergic receptor	1	0	1	0	1	0	0	1969	1983	8	1959.21	1988	8.9	2000	2011	11	12	1	40.7916	51.7916	12	23
Tafluprost (Zioptan)	Prostaglandin F receptor	1	0	1	0	1	0	0	1970	1986	7.7	1963.75	1991.07	7.6	2000	2012	12	8.92597	1	36.2509	48.2509	8.92597	20.926
Afatinib (Gilotrif)	erbb1 OR erbb2	1	0	1	0	1	0	0	1972	2009	96.5	1966.71	2007.34	104.1	2004	2013	9	-3.34149	0	37.2942	46.2942	-3.34149	5.65851
Vilazodone (Viibryd)	5-ht1a receptors OR serotonin reuptake	1	0	1	0	1	0	0	1967	1994	69.4	1967.5	1995.31	90	1996	2011	15	0.693	1	28.501	43.501	0.693	15.693
Bosutinib monohydrate (Bosulif)	src kinase	1	0	1	0	1	0	0	1974	1994	33.5	1968.55	1995.51	58.3	2005	2012	7	9.49415	1	36.4511	43.4511	9.49415	16.4941
Dolutegravir (Tivicay)	gag pol hiv	1	0	1	0	1	0	0	1982	1992	6.1	1972.79	1995.69	6.8	2007	2013	6	11.3131	1	34.2066	40.2066	11.3131	17.3131
Rilpivirine (Edurant)	gag pol hiv	1	0	1	0	1	0	0	1982	1992	6.1	1972.79	1995.69	6.8	2004	2011	7	8.31314	1	31.2066	38.2066	8.31314	15.3131
Aclidinium bromide (Tudorza Pressair)	M3 muscarinic receptor	1	0	1	0	1	0	0	1980	1990	26.9	1975.21	1993.98	31.5	2002	2012	10	8.02293	1	26.7931	36.7931	8.02293	18.0229
Simeprevir (Olysio)	HCV NS3	1	0	1	0	1	0	0	1981	2011	84.5	1976.8	2004.8	110	2007	2013	6	2.201	1	30.197	36.197	2.201	8.201
Macitentan (Opsumit)	endothelin receptor	1	0	1	0	1	0	0	1984	1992	35.9	1977.15	1994.55	44	2003	2013	10	8.45218	1	25.8459	35.8459	8.45218	18.4522
Telaprevir (Incivek)	HCV NS3	1	0	1	0	1	0	0	1981	2011	84.5	1976.8	2004.8	110	2004	2011	7	-0.799	0	27.197	34.197	-0.799	6.201
Ticagrelor (Brilinta)	p2y receptor	1	0	1	0	1	0	0	1979	2007	34.7	1977.32	2004.01	40.2	2001	2011	10	-3.01261	0	23.6796	33.6796	-3.01261	6.98739
Lorcaserin (Belviq)	5-HT2C receptor	1	0	1	0	1	0	0	1986	1996	14.4	1982.73	1998.91	18.3	2004	2012	8	5.09364	1	21.272	29.272	5.09364	13.0936
Axitinib (Inlyta)	receptors, vascular endothelial growth factor[MeSH Terms]	1	0	1	0	1	0	0	1988	2003	37.7	1984.51	2003.63	54.3	2004	2012	8	0.372	1	19.488	27.488	0.372	8.372
Azilsartan (Edarbi)	angiotensin ii type 1 receptor	1	0	1	0	1	0	0	1961	1998	110.7	1986.34	2001.97	80.4	2002	2011	9	0.0272961	1	15.6638	24.6638	0.0272961	9.0273
Avanafil (Stendra)	phosphodiesterase 5	1	0	1	0	1	0	0	1992	2006	34.2	1991.16	2005.88	43.7	2000	2012	12	-5.87815	0	8.84379	20.8438	-5.87815	6.12185
Vandetanib (Caprelsa)	vascular endothelial growth factor receptor-2[MeSH Terms]	1	0	1	0	1	0	0	1996	2004	58.4	1994.27	2005	74.6	2000	2011	11	-5	0	5.72789	16.7279	-5	6
Dapagliflozin (Farxiga)	sodium glucose transporter	1	0	1	0	1	0	0	1970	2014	91.7	1970	2000	115.9	2008	2014	6	8	1	38	44	8	14
Empagliflozin (Jardiance)	sodium glucose transporter	1	0	1	0	1	0	0	1970	2014	91.7	1970	2000	115.9	2008	2014	6	8	1	38	44	8	14
Tasimelteon (Hetlioz)	melatonin receptor	1	0	1	0	1	0	0	1967	2006	63.1	1962	2001	81.2	2006	2014	8	5	1	44	52	5	13
Olodaterol (Striverdi Respimat)	adrenoreceptor beta 2, surface	1	0	1	0	1	0	0	1969	1983	8	1959	1988	8.9	2006	2014	8	18	1	47	55	18	26
Naloxegol (Movantik)	receptors, opioid, mu[MeSH Terms]	1	0	1	0	1	0	0	1969	2001	197.6	1962	1998	302.1	2007	2014	7	9	1	45	52	9	16
Netupitant plus palonosetron (Akynzeo)	"NK1 receptor"	1	0	1	0	1	0	0	1983	1999	84.1	1978	2000	121.2	2007	2014	7	7	1	29	36	7	14
Peginesatide acetate (Omontys)	erythropoietin	0	1	1	0	0	0	1	1925	1997	39.6	1930.5	1992.9	42.2	2004	2012	8	11.0955	1	73.4959	81.4959	11.0955	19.0955
Asparaginase Erwinia chrysanthemi (Erwinaze)‡	asparaginase[MeSH Terms]	0	1	1	0	0	0	1	1945	1965	29	1934.71	1972.36	30.2		2011	11		1		76.2892		38.6389
Velaglucerase alfa (Vpriv)	"beta-glucosidase"[MeSH Terms] OR "beta-glucosidase"[All Fields]	0	1	1	0	0	0	1	1942	1999	41	1937.8	1990.84	45.3	2004	2010	6	13.1587	1	66.2031	72.2031	13.1587	19.1587
Taliglucerase alfa (Elelyso)	beta glucocerebrosidase	0	1	1	0	0	0	1	1960	1995	16.2	1956.16	1996.38	18.2	2004	2012	8	7.61613	1	47.839	55.839	7.61613	15.6161
Pertuzumab (Perjeta)‡	HER2 OR eErb2 OR p185	0	1	1	0	0	0	1	1969	2223	15.9	1967.79	2004.86	15.8	2001	2012	11	-3.86079	0	33.2118	44.2118	-3.86079	7.13921
Obinutuzumab (Gazyva)	CD20	0	1	1	0	0	0	1	1975	2003	42.7	1970.63	2002.25	32.7	2008	2013	5	5.75089	1	37.3706	42.3706	5.75089	10.7509
Tbo-Filgrastim (Neutroval)‡	Granulocyte Colony-Stimulating Factor	0	1	1	0	0	0	1	1978	1990	194	1972.49	1990.85	236	2004	2012	8	13.1493	1	31.5088	39.5088	13.1493	21.1493
Aflibercept (Eylea)‡	receptors, vascular endothelial growth factor[MeSH Terms]	0	1	1	0	0	0	1	1988	2003	37.7	1984.51	2003.63	54.3	2001	2011	10	-2.628	0	16.488	26.488	-2.628	7.372
IncobotulinumtoxinA (Xeomin)	botulinum toxin A	0	1	1	0	0	0	1	1988	2001	25.7	1984.58	2002	32	2002	2010	8	0	1	17.4233	25.4233	0	8
Ramucirumab (Cyramza)	vascular endothelial growth factor receptor-2[MeSH Terms]	0	1	1	0	0	0	1	1997	2004	91.7	1990	2007	115.9	2005	2014	9	-2	0	15	24	-2	7
Vedolizumab (Entyvio)	alpha4beta7 integrin	0	1	1	0	0	0	1	1988	2003	34.8	1985	2004	47.8	1997	2014	17	-7	0	12	29	-7	10
Peginterferon beta-1A (Plegridy)	interferon beta 1	0	1	1	0	0	0	1	1969	2010	220.8	1964	2003	278.1	2006	2014	8	3	1	42	50	3	11
Ezogabine (Potiga)	potassium voltage-gated channel	1	0	0	0	0	0	0	1985	1996	60.9	1981.18	1997.56	65.9	1996	2011	15	-1.5584	0	14.8235	29.8235	-1.5584	13.4416
Dimethyl fumarate (Tecfidera)	nrf2 OR NFE2l2	1	0	0	0	0	0	0	1991	2038	332.5	1993.04	2012.44	311.7	1999	2013	14	-13.4413	0	5.95577	19.9558	-13.4413	0.558729
Fingolimod (Gilenya)	receptors, lysosphingolipid[MeSH Terms]	1	0	0	0	0	0	0	2000	2005	19.7	1998.76	2007.13	24.2	1999	2010	11	-8.13114	0	0.238011	11.238	-8.13114	2.86886
Crofelemer (Fulyzaq)	"chloride channels"[MeSH Terms]	1	0	0	0	0	0	0	1965	2000	840.6	1960.46	1989.4	1258.8	1993	2012	19	3.599	1	32.539	51.539	3.599	22.599
Carfilzomib (Kyprolis)	proteasome endopeptidase complex[MeSH Terms]	1	0	0	0	0	0	0	1985	2000	47.4	1980.99	2000.64	69.5	2005	2012	7	4.36346	1	24.0126	31.0126	4.36346	11.3635
Ingenol mebutate (Picato)	protein kinase c-delta[MeSH Terms]	1	0	0	0	0	0	0	1974	1994	54.8	1984.67	2001.58	64.6	2004	2012	8	2.41634	1	19.3321	27.3321	2.41634	10.4163
Teriflunomide (Aubagio)	dihydroorotate dehydrogenase	1	0	0	0	0	0	0	1967	1994	5.1	1958.4	2001.03	5.5	2000	2012	12	-1.0277	0	41.6021	53.6021	-1.0277	10.9723
Eslicarbazepine acetate (Aptiom)	voltage gated sodium channel	1	0	0	0	0	0	0	1978	2005	22.9	1974.53	2003.42	28.5	2000	2013	13	-3.42283	0	25.4652	38.4652	-3.42283	9.57717
Alcaftadine (Lastacaft)	H1 histamine receptor[MeSH Terms]	1	0	0	0	0	0	0	1962	1978	10.1	1953.57	1985.51	11.4	2005	2010	5	19.4922	1	51.4285	56.4285	19.4922	24.4922
Dalfampridine (Ampyra)	potassium channel	1	0	0	0	0	0	0	1966	1990	96.3	1958.09	1989.96	150	1990	2010	20	0.035537	1	31.9083	51.9083	0.035537	20.0355
Gabapentin enacarbil (Horizant)	voltage gated calcium channel	1	0	0	0	0	0	0	1979	1995	36	1973.9	1996.85	46.9	2003	2011	8	6.14746	1	29.1024	37.1024	6.14746	14.1475
Cabazitaxel (Jevtana)	microtubule[MeSH Terms]	1	0	0	0	0	0	0	1932	1989	99.4	1920.33	1986.4	107.9	2001	2010	9	14.6031	1	80.6735	89.6735	14.6031	23.6031
Ulipristal (Ella)	progesterone receptor[MeSH Terms]	1	0	0	0	0	0	0	1953	1989	128.1	1945.36	1989.09	138.7	2002	2010	8	12.9129	1	56.6401	64.6401	12.9129	20.9129
Spinosad (Natroba)	receptors, cholinergic[MeSH Terms]	1	0	0	0	0	0	0	1958	1980	147.9	1947.7	1982.2	183.9	2007	2011	4	24.8035	1	59.304	63.304	24.8035	28.8035
Finafloxacin (Xtoro)	DNA gyrase	1	0	0	0	0	0	0	1963	2008	86.4	1957	2001	122	2007	2014	7	6	1	50	57	29	13
